# Supplementary material
Source: PubMed Central journal article supplement (PMC5868417)
Supplement: NIHMS866356-supplement-supplement_1.pdf [file NIHMS866356-supplement-supplement_1.pdf]

**Online Appendix**

*Table A1: Details Regarding Weight Construction*

| <b>State</b> | <b>Program and Weight Description</b>                                                                                                                                                                                                                                                                                                                                                                                                                                                                                                                                                                                                                                                                                                                                                                                                                                                                                                                                                                                                                                                                                                                                                                                                                                             |
|--------------|-----------------------------------------------------------------------------------------------------------------------------------------------------------------------------------------------------------------------------------------------------------------------------------------------------------------------------------------------------------------------------------------------------------------------------------------------------------------------------------------------------------------------------------------------------------------------------------------------------------------------------------------------------------------------------------------------------------------------------------------------------------------------------------------------------------------------------------------------------------------------------------------------------------------------------------------------------------------------------------------------------------------------------------------------------------------------------------------------------------------------------------------------------------------------------------------------------------------------------------------------------------------------------------|
| Colorado     | <p><i>General information:</i> 100 total points available.</p> <p><i>Clinical outcome weight calculation:</i><br/>           -Add-ons distributed in FY 2009 were based on FY 2008 clinical outcomes. 27 points total allocated to clinical measures (9 points for high-risk pressure ulcers; 9 points for physical restraint use; 9 points for pain).<br/>           -Thus, 27% weight put on clinical outcomes in FY 2008.<br/>           -Add-ons distributed in FY 2010 were based on FY 2009 clinical outcomes. 25 points total allocated to clinical measures (5 points for high-risk pressure ulcers; 5 points for physical restraint use; 5 points for pain; 5 points for urinary tract infections; 5 points for falls).<br/>           -Thus, 25% weight put on clinical outcomes in FY 2009.</p> <p><i>Staffing ratio weight calculation:</i><br/>           -No points allocated to staffing ratios.</p> <p><i>Inspection deficiency weight or qualifier calculation:</i><br/>           -No facility with “substandard quality of care deficiencies” on a regular annual, complaint, or any other Colorado Department of Public Health and Environment survey is considered for the bonus.<br/>           -Thus, inspection deficiencies are used as a qualifier.</p> |
| Georgia      | <p><i>General information:</i> Maximum of a 3% per diem add-on available.<br/>           -Composed of a staffing incentive that is a 1% add-on based on staffing ratios and a separate 2% add-on based on a 10 total point performance score.</p> <p><i>Clinical outcome weight calculation:</i><br/>           -6 of the 10 points that are part of the 2% add-on are allocated to clinical measures (1 point for high-risk long-stay residents who have pressure ulcers; 1 point for long-stay physical restraint use; 1 point for long-stay residents with pain; 1 point for short-stay residents with pain; 1 point for residents who receive flu vaccine; 1 point for low-risk long-stay residents who have pressure ulcers).<br/>           -Thus, 60% of the 2% add-on incentive is based on clinical outcomes, which means 40% of the total 3% add-on is based on clinical outcomes.</p> <p><i>Staffing ratio weight calculation:</i><br/>           -1% add-on requires staffing hours are at least 2.5 hours per resident day.<br/>           -Thus, 33% of the total 3% add-on is based on staffing ratios.</p>                                                                                                                                                        |

|           |                                                                                                                                                                                                                                                                                                                                                                                                                                                                                                                                                                                                                                                                                                                                                                                                                                                                                                                              |
|-----------|------------------------------------------------------------------------------------------------------------------------------------------------------------------------------------------------------------------------------------------------------------------------------------------------------------------------------------------------------------------------------------------------------------------------------------------------------------------------------------------------------------------------------------------------------------------------------------------------------------------------------------------------------------------------------------------------------------------------------------------------------------------------------------------------------------------------------------------------------------------------------------------------------------------------------|
|           | <p><i>Inspection deficiency weight or qualifier calculation:</i></p> <ul style="list-style-type: none"> <li>-Facility placed on the Special Focus List produced by CMS cannot earn the add-on until its next standard or compliant survey does not have a deficiency over Level E in scope and severity; and, the facility's second standard or compliant survey after being placed on the list does not have a deficiency over Level E in scope and severity.</li> <li>-Thus, inspection deficiencies are used as a qualifier.</li> </ul>                                                                                                                                                                                                                                                                                                                                                                                   |
| Iowa      | <p><i>General information:</i> 11 total points available.</p> <p><i>Clinical outcome weight calculation:</i></p> <ul style="list-style-type: none"> <li>-No points allocated to clinical outcomes.</li> </ul> <p><i>Staffing ratio weight calculation:</i></p> <ul style="list-style-type: none"> <li>-Facility can earn up to 2 points if their CMI-adjusted nursing hours are at or above the 75<sup>th</sup> percentile (1 point if the hours fall between the 50<sup>th</sup> and 75<sup>th</sup> percentiles).</li> <li>-Thus, the weight put on staffing ratios is 18.2%.</li> </ul> <p><i>Inspection deficiency weight or qualifier calculation:</i></p> <ul style="list-style-type: none"> <li>-Facility with a deficiency-free survey receives 2 points (1 point for regulatory compliance with the survey but not deficiency free).</li> <li>-Thus, the weight put on inspection deficiencies is 18.2%.</li> </ul> |
| Kansas    | <p><i>General information:</i> 9 total points available.</p> <p><i>Clinical outcome weight calculation:</i></p> <ul style="list-style-type: none"> <li>-No points allocated to clinical outcomes.</li> </ul> <p><i>Staffing ratio weight calculation:</i></p> <ul style="list-style-type: none"> <li>-Facility can earn up to 2 points if its CMI-adjusted nurse staffing ratio is greater than or equal to 120% of the state median (1 point if the ratio is between 110 and 120% of the state median).</li> <li>-Thus, the weight put on staffing ratios is 22.2%.</li> </ul> <p><i>Inspection deficiency weight or qualifier calculation:</i></p> <ul style="list-style-type: none"> <li>-No points allocated to inspection deficiencies and deficiencies are not used as a qualifier.</li> </ul>                                                                                                                         |
| Minnesota | <p><i>General information:</i> 100 total points available in both FY 2006 and FY 2007.</p> <p><i>Clinical outcome weight calculation:</i></p> <ul style="list-style-type: none"> <li>-In FY 2006, a facility could earn up to 40 points if its Quality Indicator (QI) score was above a certain threshold. (QI score ranged from 0-100 points and was based on 24 different quality indicators).</li> <li>-Thus, the weight put on clinical outcomes was 40% in FY 2006.</li> <li>-In FY 2007, a facility could earn up to 35 points if its QI score was above a certain threshold.</li> </ul>                                                                                                                                                                                                                                                                                                                               |

|          |                                                                                                                                                                                                                                                                                                                                                                                                                                                                                                                                                                                                                                                                                                                                                                                                                                           |
|----------|-------------------------------------------------------------------------------------------------------------------------------------------------------------------------------------------------------------------------------------------------------------------------------------------------------------------------------------------------------------------------------------------------------------------------------------------------------------------------------------------------------------------------------------------------------------------------------------------------------------------------------------------------------------------------------------------------------------------------------------------------------------------------------------------------------------------------------------------|
|          | <p>-Thus, the weight put on clinical outcomes was 35% in FY 2007.</p> <p><i>Staffing ratio weight calculation:</i><br/>         -No points allocated to staffing ratios in FY 2006.<br/>         -In FY 2007, 10 points allocated to CMI-adjusted staffing hours. Thresholds required to receive the points varied with facility type (standard, hospital-attached, and boarding care homes).<br/>         -Thus, the weight put on staffing ratios was 10% in FY 2007.</p> <p><i>Inspection deficiency weight or qualifier calculation:</i><br/>         -In both FY 2006 and 2007, up to 10 points could be earned if a facility's deficiencies were all below Level F in scope and severity (5 points if highest deficiencies were at Level F or G).<br/>         -Thus, the weight put on inspection deficiencies was 10%.</p>        |
| Ohio     | <p><i>General information:</i> 9 total points available.</p> <p><i>Clinical outcome weight calculation:</i><br/>         -No points allocated to clinical outcomes.</p> <p><i>Staffing ratio weight calculation:</i><br/>         -Facility with nursing hours per resident day above the state average receives 1 point.<br/>         -Thus, the weight put on staffing ratios is 11.1%.</p> <p><i>Inspection deficiency weight or qualifier calculation:</i><br/>         -1 point can be earned if there are no health deficiencies with scope and severity greater than Level E on the facility's most recent standard survey.<br/>         -An additional 1 point can be earned by a facility that is deficiency-free on its most recent standard survey.<br/>         -Thus, the weight put on inspection deficiencies is 22.2%</p> |
| Oklahoma | <p><i>General information:</i> 10 total points available.</p> <p><i>Clinical outcome weight calculation:</i><br/>         -Facility can receive 1 point if it is above the 50<sup>th</sup> percentile on the following measures: falls, catheters, physical restraints, weight loss, and pressure ulcers.<br/>         -Each of the clinical measures is percentile-ranked within the state and then combined for a composite percentile score to determine if the facility meets the threshold to receive the 1 point.<br/>         -Thus, the weight put on clinical outcomes is 10%.</p> <p><i>Staffing ratio weight calculation:</i><br/>         -Facility can receive 1 point if its nursing staff per resident day is above the 50<sup>th</sup> percentile.<br/>         -Thus, the weight put on staffing ratios is 10%.</p>      |

|      |                                                                                                                                                                                                                                                                                                                                                                                                                                                                                                                                                                                                                                                                                                       |
|------|-------------------------------------------------------------------------------------------------------------------------------------------------------------------------------------------------------------------------------------------------------------------------------------------------------------------------------------------------------------------------------------------------------------------------------------------------------------------------------------------------------------------------------------------------------------------------------------------------------------------------------------------------------------------------------------------------------|
|      | <p><i>Inspection deficiency weight or qualifier calculation:</i></p> <ul style="list-style-type: none"> <li>-Facility can earn 1 point for either being deficiency free or for having no deficiencies worse than Level D in scope and severity in care-related areas and no deficiencies worse than Level E in scope and severity in non-care related areas on its state survey.</li> <li>-Thus, the weight put on inspection deficiencies is 10%.</li> </ul>                                                                                                                                                                                                                                         |
| Utah | <p><i>General information:</i> Not a point-based program.</p> <p><i>Clinical outcome weight calculation:</i></p> <ul style="list-style-type: none"> <li>-Clinical outcomes do not factor into the bonus.</li> </ul> <p><i>Staffing ratio weight calculation:</i></p> <ul style="list-style-type: none"> <li>-Staffing ratios do not factor into the bonus.</li> </ul> <p><i>Inspection deficiency weight or qualifier calculation:</i></p> <ul style="list-style-type: none"> <li>-To qualify, a facility must not have deficiencies that reach an “immediate jeopardy” level at the most recent re-certification survey.</li> <li>-Thus, inspection deficiencies are used as a qualifier.</li> </ul> |

Table A2: Results from Regressions Estimating the Effect of P4P on Clinical Quality Outcomes with Comprehensive Set of P4P Variables

| Panel A: Coefficient Estimates |                          |                        |                         |                         |                          |                        |
|--------------------------------|--------------------------|------------------------|-------------------------|-------------------------|--------------------------|------------------------|
|                                | Physically<br>Restrained | Pressure<br>Sores      | Pain                    | Weight<br>Loss          | Catheter<br>Inserted     | Falls                  |
| P4P                            | 0.0276***<br>(0.00305)   | -0.000784<br>(0.00347) | -0.0411***<br>(0.00546) | -0.00127<br>(0.00263)   | 0.00290<br>(0.00233)     | 0.00424**<br>(0.00216) |
| P4PClinical                    | -0.0349***<br>(0.00590)  | 0.00702<br>(0.00612)   | 0.0400***<br>(0.00951)  | 0.0168***<br>(0.00423)  | 0.000266<br>(0.00383)    | 0.0101***<br>(0.00347) |
| P4PClinicalWeight              | 0.0529***<br>(0.0159)    | -0.0171<br>(0.0171)    | -0.0853***<br>(0.0249)  | -0.0458***<br>(0.0119)  | 0.0112<br>(0.0108)       | -0.0358***<br>(0.0100) |
| P4PDeficWeight                 | -0.0337**<br>(0.0151)    | 0.00354<br>(0.0183)    | 0.186***<br>(0.0268)    | 0.00273<br>(0.0130)     | -0.0130<br>(0.0129)      | -0.0127<br>(0.0117)    |
| P4PDeficQualifier              | -0.00562*<br>(0.00324)   | -0.00686*<br>(0.00354) | -0.0146**<br>(0.00583)  | -0.00711**<br>(0.00282) | -0.00716***<br>(0.00234) | -0.00229<br>(0.00225)  |
| P4PStaffing                    | 0.00191<br>(0.00388)     | -0.00468<br>(0.00508)  | -0.0167***<br>(0.00608) | 0.00237<br>(0.00362)    | -0.00191<br>(0.00358)    | -0.00195<br>(0.00389)  |
| P4PStaffingWeight              | -0.100***<br>(0.0212)    | 0.0202<br>(0.0245)     | 0.167***<br>(0.0348)    | 0.00292<br>(0.0177)     | -0.00242<br>(0.0167)     | 0.0201<br>(0.0168)     |
| Constant                       | 0.0215**<br>(0.0102)     | 0.220***<br>(0.0176)   | 0.383***<br>(0.0184)    | 0.0166<br>(0.0133)      | 0.109***<br>(0.0160)     | 0.0488***<br>(0.00757) |
| Time FEs                       | Yes                      | Yes                    | Yes                     | Yes                     | Yes                      | Yes                    |
| Facility Covariates            | Yes                      | Yes                    | Yes                     | Yes                     | Yes                      | Yes                    |

|                                                |                          |                       |                         |                         |                         |                         |
|------------------------------------------------|--------------------------|-----------------------|-------------------------|-------------------------|-------------------------|-------------------------|
| <i>N</i>                                       | 518243                   | 514433                | 518222                  | 517984                  | 515469                  | 514795                  |
| R2                                             | 0.147                    | 0.0364                | 0.0604                  | 0.0274                  | 0.0515                  | 0.00427                 |
| Panel B: Range of Effects                      |                          |                       |                         |                         |                         |                         |
| Effect given smallest clinical weight (0.10)   | -0.02961***<br>(0.00447) | 0.00531<br>(0.00460)  | 0.03151***<br>(0.00733) | 0.01220***<br>(0.00321) | 0.00139<br>(0.00288)    | 0.00648**<br>(0.00260)  |
| Effect given largest clinical weight (0.40)    | -0.01373***<br>(0.00238) | 0.00017<br>(0.00273)  | 0.00591<br>(0.00427)    | -0.00153<br>(0.00216)   | 0.00475***<br>(0.00177) | -0.00427**<br>(0.00173) |
| Effect given smallest deficiency weight (0.10) | -0.00337**<br>(0.00151)  | 0.00035<br>(0.00183)  | 0.01862***<br>(0.00268) | 0.00027<br>(0.00130)    | -0.00130<br>(0.00129)   | -0.00127<br>(0.00116)   |
| Effect given largest deficiency weight (0.222) | -0.00748**<br>(0.00335)  | 0.00078<br>(0.00405)  | 0.04133***<br>(0.00594) | 0.00060<br>(0.00288)    | -0.00288<br>(0.00286)   | -0.00281<br>(0.00259)   |
| Effect given smallest staffing weight (0.10)   | -0.00810***<br>(0.00226) | -0.00266<br>(0.00306) | -0.00002<br>(0.00341)   | 0.00266<br>(0.00223)    | -0.00215<br>(0.00215)   | 0.00006<br>(0.00243)    |
| Effect given largest staffing weight (0.333)   | -0.03141***<br>(0.00409) | 0.00206<br>(0.00422)  | 0.03879***<br>(0.00684) | 0.00334<br>(0.00319)    | -0.00271<br>(0.00267)   | 0.00474*<br>(0.00254)   |

*Notes:* Standard errors are clustered at the facility level and shown in parentheses. In Panel B, the effects are relative to having a P4P program that does not reward that particular metric.

\* p<.1, \*\* p<.05, \*\*\* p<.01

Table A3: Results from Regressions Estimating the Effect of P4P on the Probability of Having Inspection Deficiencies with Comprehensive Set of P4P Variables

| Panel A: Coefficient Estimates                    |                          |                                           |
|---------------------------------------------------|--------------------------|-------------------------------------------|
|                                                   | Any<br>Deficiencies      | Any Immediate<br>Jeopardy<br>Deficiencies |
| P4P                                               | 0.0659***<br>(0.0131)    | -0.00806<br>(0.00867)                     |
| P4PDeficWeight                                    | -0.228***<br>(0.0732)    | -0.0137<br>(0.0459)                       |
| P4PDeficQualifier                                 | -0.0501***<br>(0.0130)   | -0.00356<br>(0.00883)                     |
| P4PClinical                                       | -0.0305*<br>(0.0184)     | 0.0443**<br>(0.0216)                      |
| P4PClinicalWeight                                 | 0.0532<br>(0.0536)       | -0.128**<br>(0.0596)                      |
| P4PStaffing                                       | 0.0156<br>(0.0196)       | 0.00206<br>(0.0130)                       |
| P4PStaffingWeight                                 | -0.248***<br>(0.0935)    | 0.0263<br>(0.0621)                        |
| Constant                                          | 0.763***<br>(0.0270)     | 0.0655***<br>(0.0161)                     |
| Time FEs                                          | Yes                      | Yes                                       |
| Facility Covariates                               | Yes                      | Yes                                       |
| <i>N</i>                                          | 518249                   | 518237                                    |
| <i>R</i> <sup>2</sup>                             | 0.00557                  | 0.00122                                   |
| Panel B: Range of Effects                         |                          |                                           |
| Effect given smallest<br>deficiency weight (0.10) | -0.02277***<br>(0.00732) | -0.00137<br>(0.00459)                     |
| Effect given largest<br>deficiency weight (0.222) | -0.05055***<br>(0.01625) | -0.00304<br>(0.01018)                     |
| Effect given smallest<br>clinical weight (0.10)   | -0.02519*<br>(0.01397)   | 0.03155**<br>(0.01603)                    |
| Effect given largest<br>clinical weight (0.40)    | -0.00923<br>(0.01034)    | -0.00676<br>(0.00729)                     |

|                                                 |                          |                      |
|-------------------------------------------------|--------------------------|----------------------|
| Effect given smallest<br>staffing weight (0.10) | -0.00915<br>(0.01164)    | 0.00468<br>(0.00782) |
| Effect given largest<br>staffing weight (0.333) | -0.06690***<br>(0.01536) | 0.01080<br>(0.01037) |

*Notes:* Standard errors are clustered at the facility level and shown in parentheses.

In Panel B, the effects are relative to having a P4P program that does not reward that particular metric.

\* p<.1, \*\* p<.05, \*\*\* p<.01



Table A4: Results from Regressions Estimating the Effect of P4P on Staffing Ratios with Comprehensive Set of P4P Variables

| Panel A: Coefficient Estimates                  |                          |                        |
|-------------------------------------------------|--------------------------|------------------------|
|                                                 | Total Staffing<br>HPRD   | RN+LPN<br>HPRD         |
| P4P                                             | 0.0861**<br>(0.0406)     | -0.0240<br>(0.0182)    |
| P4PStaffing                                     | -0.157***<br>(0.0496)    | -0.0500**<br>(0.0244)  |
| P4PStaffingWeight                               | 0.505*<br>(0.268)        | 0.253**<br>(0.127)     |
| P4PClinical                                     | 0.133*<br>(0.0701)       | 0.0821**<br>(0.0402)   |
| P4PClinicalWeight                               | -0.423**<br>(0.187)      | -0.194*<br>(0.108)     |
| P4PDeficWeight                                  | -0.304<br>(0.198)        | 0.0925<br>(0.0887)     |
| P4PDeficQualifier                               | -0.0992**<br>(0.0435)    | 0.0124<br>(0.0198)     |
| Constant                                        | 3.087***<br>(0.144)      | 1.324***<br>(0.0923)   |
| Time FEs                                        | Yes                      | Yes                    |
| Facility Covariates                             | Yes                      | Yes                    |
| <i>N</i>                                        | 518249                   | 518249                 |
| <i>R</i> <sup>2</sup>                           | 0.0250                   | 0.0227                 |
| Panel B: Range of Effects                       |                          |                        |
| Effect given smallest<br>staffing weight (0.10) | -0.10697***<br>(0.02910) | -0.02477*<br>(0.01492) |
| Effect given largest<br>staffing weight (0.333) | 0.01058<br>(0.05157)     | 0.03410<br>(0.02453)   |
| Effect given smallest<br>clinical weight (0.10) | 0.09058*<br>(0.05376)    | 0.06272**<br>(0.03012) |
| Effect given largest<br>clinical weight (0.40)  | -0.03645<br>(0.03212)    | 0.00446<br>(0.01375)   |
| Effect given smallest                           | -0.03043                 | 0.00925                |

|                           |           |           |
|---------------------------|-----------|-----------|
| deficiency weight (0.10)  | (0.01983) | (0.00887) |
| Effect given largest      | -0.06755  | 0.02054   |
| deficiency weight (0.222) | (0.04402) | (0.01970) |

*Notes:* Standard errors are clustered at the facility level and shown in parentheses.

In Panel B, the effects are relative to having a P4P program that does not reward that particular metric.

\* p<.1, \*\* p<.05, \*\*\* p<.01
